# Supplementary material for: Post-radiation neutrophil-to-lymphocyte ratio is a prognostic marker in patients with localized pancreatic adenocarcinoma treated with anti-PD-1 antibody and stereotactic body radiation therapy
Source: PubMed Central journal article supplement — Radiat Oncol J. 2022 May 20;40(2):111–9. doi: 10.3857/roj.2021.01060 (PMC9262702; doi:10.3857/roj.2021.01060), 2022-05-20
Supplement: roj-2021-01060-suppl1.pdf [file roj-2021-01060-suppl1.pdf]

**Table S1.** Univariate and multivariable analyses of local progression-free survival

|                                   | Univariate |           |         | Multivariable |        |         |
|-----------------------------------|------------|-----------|---------|---------------|--------|---------|
|                                   | HR         | 95% CI    | p-value | HR            | 95% CI | p-value |
| Age (yr)                          | 0.98       | 0.93–1.03 | 0.416   |               |        |         |
| Sex (male vs. female)             | 1.84       | 0.65–5.24 | 0.252   |               |        |         |
| ECOG performance status (1 vs. 0) | 1.34       | 0.47–3.81 | 0.581   |               |        |         |
| Disease extent (BRPC vs. LAPC)    | 0.64       | 0.08–4.81 | 0.661   |               |        |         |
| Tumor location (head vs. other)   | 2.05       | 0.75–5.56 | 0.159   |               |        |         |
| Induction CT duration (mo)        | 0.83       | 0.56–1.24 | 0.368   |               |        |         |
| Induction CT (FFX vs. GnP)        | 0.68       | 0.15–3.04 | 0.618   |               |        |         |
| Grade (I/II vs. III)              | 0.85       | 0.29–2.48 | 0.762   |               |        |         |
| Resected (yes vs. no)             | 0.51       | 0.20–1.33 | 0.167   |               |        |         |
| CTV (cm <sup>3</sup> )            | 1.01       | 1.00–1.02 | 0.019   |               |        |         |
| Baseline CA19-9 (U/mL)            | 1.00       | 0.99–1.00 | 0.222   |               |        |         |
| Pre-SBRT CA19-9 (U/mL)            | 1.00       | 0.99–1.00 | 0.984   |               |        |         |
| Baseline total bilirubin (mg/dL)  | 1.06       | 0.91–1.17 | 0.369   |               |        |         |
| Pre-SBRT                          |            |           |         |               |        |         |
| ALC ( $\times 10^3/\mu\text{L}$ ) | 1.21       | 0.63–2.11 | 0.542   |               |        |         |
| NLR                               | 0.90       | 0.64–1.08 | 0.438   |               |        |         |
| Post-SBRT                         |            |           |         |               |        |         |
| ALC ( $\times 10^3/\mu\text{L}$ ) | 1.02       | 0.26–3.34 | 0.975   |               |        |         |
| NLR                               | 0.96       | 0.75–1.11 | 0.665   |               |        |         |

ECOG, Eastern Cooperative Oncology Group; BRPC, borderline resectable pancreatic cancer; LAPC, locally advanced pancreatic cancer; CT, chemotherapy; FFX, FOLFIRINOX; GnP, gemcitabine/nab-paclitaxel; CTV, Clinical target volume; CA19-9, cancer antigen 19-9; SBRT, stereotactic body radiation therapy; ALC, absolute lymphocyte count; ANC, absolute neutrophil count; NLR, neutrophil to lymphocyte ratio; HR, hazard ratio; CI, confidence interval.
